# Supplementary material for: Three for the Price of One: Concomitant I⋯N, I⋯O, and I⋯π Halogen Bonds in the Same Crystal Structure
Source: MDPI journal article supplement (doi:10.3390/molecules27217550), 2022-11-03
Supplement: s1 [file s1]

# Supplementary Materials: Three for the Price of One: Concomitant I...N, I...O and I... $\pi$ Halogen Bonds in the Same Crystal Structure

Steven van Terwingen <sup>1</sup>, Ruimin Wang <sup>1,2</sup> and Ulli Englert <sup>1,2,\*</sup>

## 1. Crystal Data and Refinement Results

**Table S1.** Crystal data for compound **1** at 100(2) K.

| Compound                                                  | <b>1</b>                                                                                                            |
|-----------------------------------------------------------|---------------------------------------------------------------------------------------------------------------------|
| Empirical formula                                         | C <sub>20</sub> H <sub>16</sub> F <sub>6</sub> I <sub>3</sub> N <sub>2</sub> O <sub>2</sub>                         |
| Moiety formula                                            | C <sub>11</sub> H <sub>16</sub> N <sub>2</sub> O <sub>2</sub> , 1.5 (C <sub>6</sub> F <sub>4</sub> I <sub>2</sub> ) |
| $M_r$ / g mol <sup>-1</sup>                               | 811.05                                                                                                              |
| Crystal description                                       | colorless block                                                                                                     |
| Crystal size / mm <sup>3</sup>                            | 0.16 × 0.16 × 0.12                                                                                                  |
| Crystal system                                            | triclinic                                                                                                           |
| Space group (No.)                                         | $P\bar{1}$ (2)                                                                                                      |
| $a$ / Å                                                   | 10.4664(18)                                                                                                         |
| $b$ / Å                                                   | 11.877(2)                                                                                                           |
| $c$ / Å                                                   | 12.281(2)                                                                                                           |
| $\alpha$ / °                                              | 109.054(3)                                                                                                          |
| $\beta$ / °                                               | 103.144(3)                                                                                                          |
| $\gamma$ / °                                              | 111.803(3)                                                                                                          |
| $V$ / Å <sup>3</sup>                                      | 1229.5(4)                                                                                                           |
| $Z$                                                       | 2                                                                                                                   |
| $D_{\text{calc}}$ / g cm <sup>-3</sup>                    | 2.191                                                                                                               |
| $\mu$ / mm <sup>-1</sup>                                  | 3.879                                                                                                               |
| $\lambda$ / Å                                             | 0.71073                                                                                                             |
| $\sin(\theta_{\text{max}}) / \lambda$ / Å <sup>-1</sup>   | 1.00                                                                                                                |
| total/unique refl.                                        | 119971/20085                                                                                                        |
| observed refl.                                            | 11830                                                                                                               |
| No. of parameters                                         | 306                                                                                                                 |
| $R_{\text{int}}$                                          | 0.1363                                                                                                              |
| $R(I > 2\sigma(I))$                                       | 0.0548                                                                                                              |
| $wR_2$ (all data)                                         | 0.1451                                                                                                              |
| $S$                                                       | 1.058                                                                                                               |
| $\rho_{\text{min}}/\rho_{\text{max}}$ / e Å <sup>-3</sup> | -2.395/1.901                                                                                                        |
| CCDC #                                                    | 2209103                                                                                                             |

## 2. Powder X-Ray Diffraction

The simulated powder pattern refers to the temperature of the single-crystal diffraction experiment (100 K). As most materials expand with increasing temperature, the simulation is probably associated with a smaller unit cell in real space and thus with larger  $2\theta$  in reciprocal space. This results in a slight systematic shift between experimental and simulated diffraction patterns.

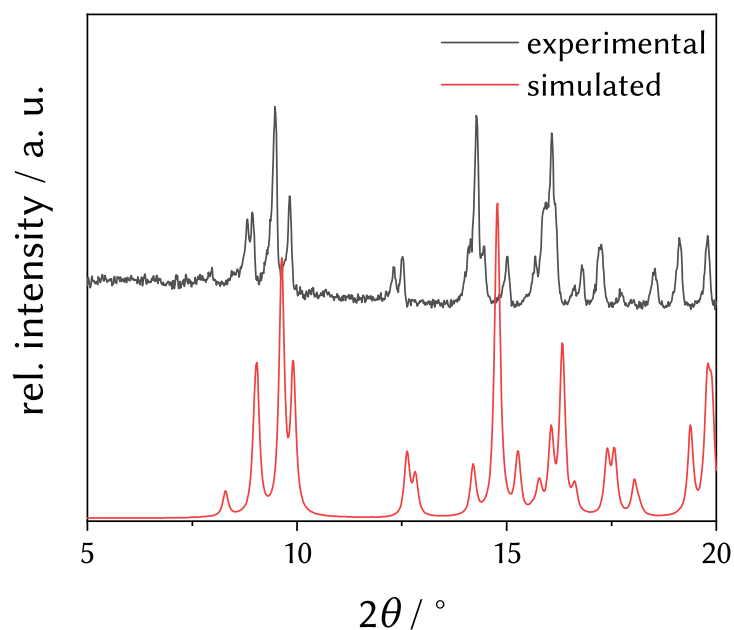

**Figure S1.** Simulated (red) and experimental (black) powder patterns of **1**.

### 3. Thermoanalysis

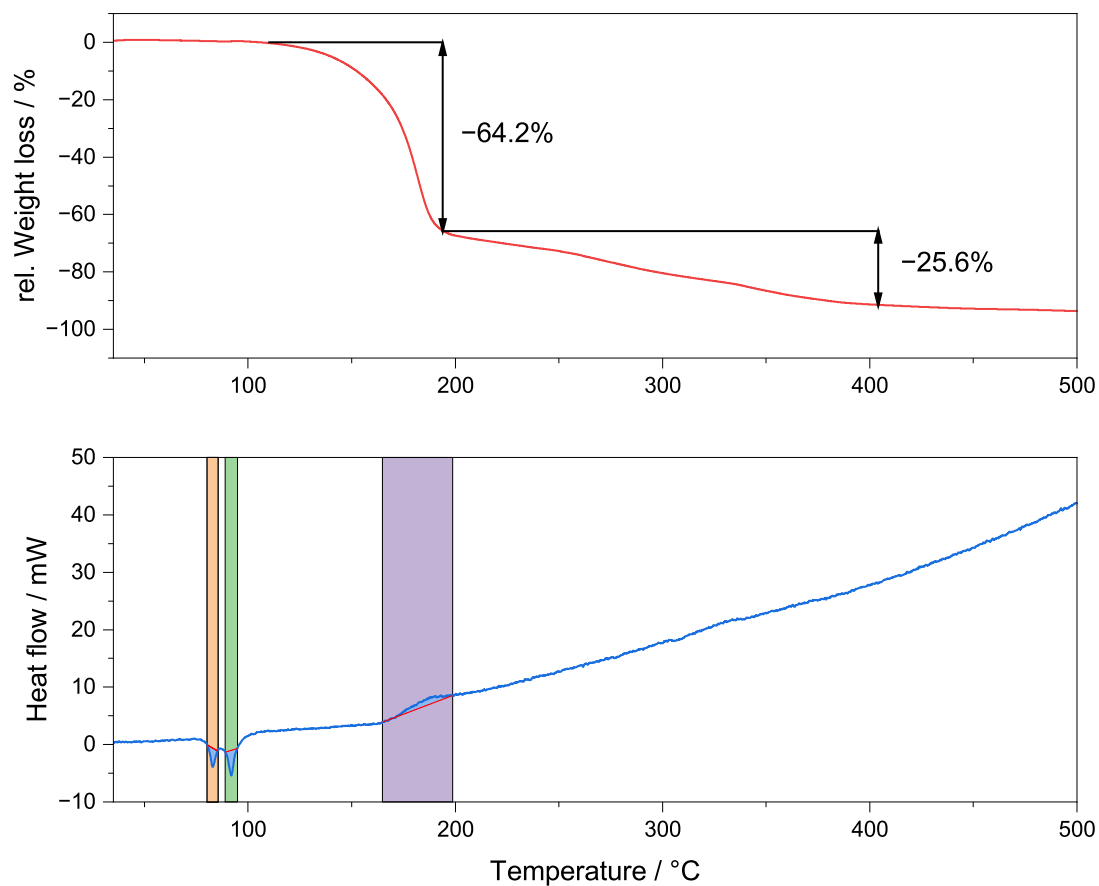

**Figure S2.** Top: Thermogravimetric analysis curve with relative mass loss added. Bottom: Differential scanning calorimetry curve with three integrals added in different colors.

**Table S2.** Key data for the differential scanning calorimetry.

| Onset / °C | Offset / °C | Maximum / °C | Heat flow / mW | Specific heat capacity / J K <sup>-1</sup> g <sup>-1</sup> |
|------------|-------------|--------------|----------------|------------------------------------------------------------|
| 80.3       | 85.4        | 82.8         | -3.8           | 2.8                                                        |
| 88.9       | 94.9        | 91.9         | -5.6           | 4.2                                                        |
| 164.8      | 198.8       | 187.8        | 1.2            | /                                                          |

#### 4. Computational Details

**Table S3.** Calculated interaction energies  $E_{\text{tot}}$  and its components in  $\text{kJ mol}^{-1}$  in the non-covalent contacts **A** to **D** calculated with CrystalExplorer [1,2].

| Contact      | $E_{\text{ele}}$ | $E_{\text{pol}}$ | $E_{\text{dis}}$ | $E_{\text{rep}}$ | $E_{\text{tot}}$ |
|--------------|------------------|------------------|------------------|------------------|------------------|
| <b>A</b>     | −44.6            | −7.5             | −15.5            | 49.6             | −24.1            |
| <b>B</b>     | −24.7            | −3.4             | −9.2             | 29.8             | −11.5            |
| <b>C + D</b> | −20.1            | −2.9             | −28.9            | 29.0             | −24.9            |

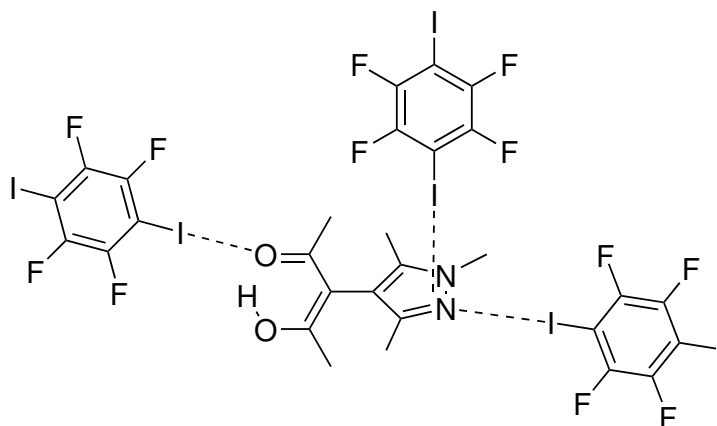

**Figure S3.** Expanded asymmetric unit used for the single-point calculation to derive the electron density  $\rho$  in **1**.

**Table S4.** Cartesian coordinates of the expanded asymmetric unit (cf. Figure S3) used as Gaussian input for the single-point calculation.

| Molecule         | Atom type | $x$    | $y$     | $z$    |
|------------------|-----------|--------|---------|--------|
| <b>HacacMePz</b> | O         | 6.215  | −0.158  | 6.138  |
|                  | O         | 7.642  | 1.383   | 4.844  |
|                  | N         | 2.490  | 1.748   | 2.150  |
|                  | N         | 2.979  | 0.676   | 1.470  |
|                  | C         | 4.025  | −0.772  | 5.495  |
|                  | C         | 5.306  | −0.022  | 5.288  |
|                  | C         | 5.465  | 0.816   | 4.131  |
|                  | C         | 6.662  | 1.486   | 3.961  |
|                  | C         | 7.017  | 2.317   | 2.786  |
|                  | C         | 3.134  | 3.013   | 4.180  |
|                  | C         | 3.330  | 1.921   | 3.179  |
|                  | C         | 4.360  | 0.961   | 3.151  |
|                  | C         | 4.088  | 0.173   | 2.041  |
|                  | C         | 4.812  | −1.042  | 1.554  |
|                  | C         | 2.298  | 0.252   | 0.261  |
|                  | H         | 4.1319 | −1.4484 | 6.3416 |
|                  | H         | 3.7926 | −1.3457 | 4.5985 |
|                  | H         | 3.2195 | −0.0665 | 5.6935 |
|                  | H         | 7.3710 | 0.8010  | 5.6015 |
|                  | H         | 7.2159 | 3.3374  | 3.1100 |
|                  | H         | 6.1900 | 2.3154  | 2.0773 |
|                  | H         | 7.9056 | 1.9076  | 2.3072 |

|                |   |         |         |         |
|----------------|---|---------|---------|---------|
|                | H | 2.3221  | 3.6618  | 3.8559  |
|                | H | 4.0505  | 3.5945  | 4.2665  |
|                | H | 2.8871  | 2.5778  | 5.1476  |
|                | H | 4.1899  | −1.9224 | 1.7082  |
|                | H | 5.7433  | −1.1557 | 2.1078  |
|                | H | 5.0326  | −0.9348 | 0.4932  |
|                | H | 2.9425  | −0.4222 | −0.3014 |
|                | H | 2.0630  | 1.1225  | −0.3493 |
|                | H | 1.3770  | −0.2656 | 0.5260  |
| <b>TFDIB A</b> | I | 0.2082  | 3.3863  | 1.3921  |
|                | F | −2.190  | 2.890   | −0.674  |
|                | F | −0.441  | 6.512   | 1.802   |
|                | C | −2.189  | 4.181   | −0.317  |
|                | C | −1.278  | 4.646   | 0.616   |
|                | C | −1.310  | 5.995   | 0.919   |
|                | I | −4.6195 | 7.6411  | −1.3921 |
|                | F | −2.221  | 8.137   | 0.674   |
|                | F | −3.970  | 4.516   | −1.802  |
|                | C | −2.222  | 6.846   | 0.317   |
|                | C | −3.133  | 6.381   | −0.616  |
|                | C | −3.101  | 5.032   | −0.919  |
| <b>TFDIB B</b> | I | 8.3471  | −0.3805 | 8.1340  |
|                | F | 10.778  | −2.182  | 9.160   |
|                | F | 8.884   | 2.028   | 10.164  |
|                | C | 10.739  | −1.048  | 9.878   |
|                | C | 9.780   | −0.092  | 9.587   |
|                | C | 9.775   | 1.055   | 10.388  |
|                | I | 13.0554 | 0.5373  | 13.1715 |
|                | F | 10.624  | 2.338   | 12.145  |
|                | F | 12.519  | −1.872  | 11.142  |
|                | C | 10.664  | 1.205   | 11.427  |
|                | C | 11.623  | 0.248   | 11.718  |
|                | C | 11.628  | −0.898  | 10.918  |
| <b>TFDIB C</b> | I | 0.4654  | −0.2993 | 3.6371  |
|                | F | −2.568  | −1.254  | 3.364   |
|                | F | 1.209   | −2.352  | 5.993   |
|                | C | −1.973  | −1.959  | 4.339   |
|                | C | −0.638  | −1.745  | 4.640   |
|                | C | −0.067  | −2.527  | 5.648   |
|                | I | −3.2581 | −5.1360 | 7.0157  |
|                | F | −0.225  | −4.181  | 7.289   |
|                | F | −4.002  | −3.083  | 4.660   |
|                | C | −0.820  | −3.476  | 6.314   |
|                | C | −2.155  | −3.691  | 6.012   |
|                | C | −2.725  | −2.909  | 5.005   |

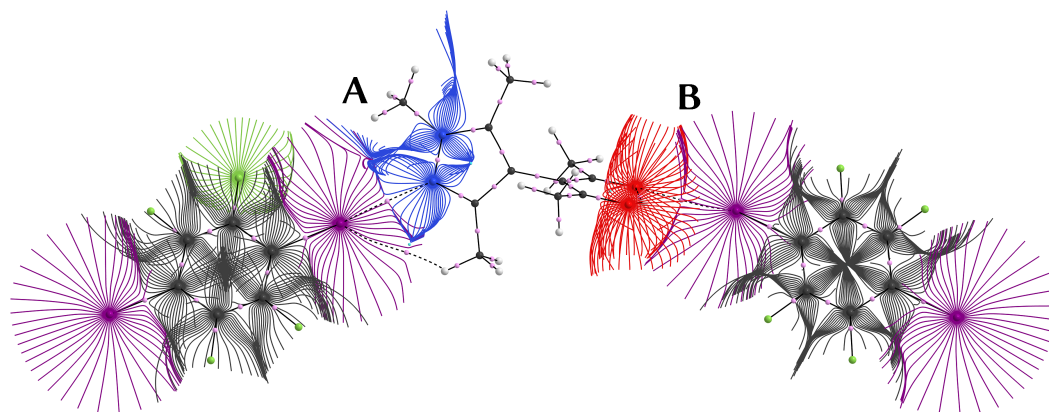

**Figure S4.** Trajectory plots [3] in **1** to highlight contacts **A** and **B**; short contacts (hydrogen and halogen bonds) are shown as dashed lines, BCPs (3, -1) as pink spheres, ring critical points (3, 1) as light blue spheres.

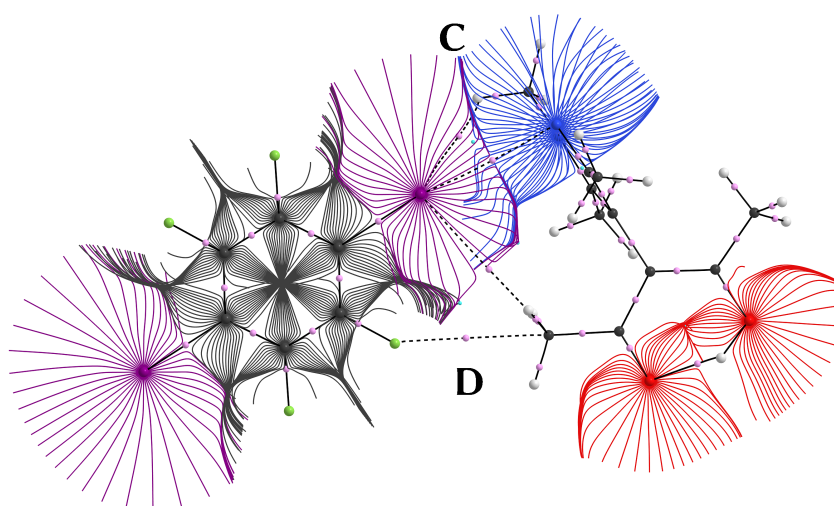

**Figure S5.** Trajectory plots [3] in **1** to highlight contacts **C** and **D**; short contacts (hydrogen and halogen bonds) are shown as dashed lines, BCPs (3, -1) as pink spheres, ring critical points (3, 1) as light blue spheres.

## References

1. Spackman, P.R.; Turner, M.J.; McKinnon, J.J.; Wolff, S.K.; Grimwood, D.J.; Jayatilaka, D.; Spackman, M.A. CrystalExplorer: a program for Hirshfeld surface analysis, visualization and quantitative analysis of molecular crystals. *J. Appl. Crystallogr.* **2021**, *54*, 1006–1011. <https://doi.org/10.1107/S1600576721002910>.
2. Turner, M.J.; Grabowsky, S.; Jayatilaka, D.; Spackman, M.A. Accurate and Efficient Model Energies for Exploring Intermolecular Interactions in Molecular Crystals. *J. Phys. Chem. Lett.* **2014**, *5*, 4249–4255. <https://doi.org/10.1021/jz502271c>.
3. Keith, T.A. *AIMAll: Version 17.01.25*; TK Gristmill Software: Overland Park KS, USA, 2017.
